# Supplementary material for: High gamma response tracks different syntactic structures in homophonous phrases
Source: PubMed Central journal article supplement (PMC7200802; doi:10.1038/s41598-020-64375-9), 2020-05-05
Supplement: 41598_2020_64375_MOESM1_ESM.pdf [file 41598_2020_64375_MOESM1_ESM.pdf]

1 **High gamma response tracks different syntactic**  
2 **structures in homophonous phrases**

3

4 Fiorenzo Artoni<sup>1,2</sup>, Piergiorgio d’Orio<sup>3,4</sup>, Eleonora Catricalà<sup>5</sup>, Francesca Conca<sup>5</sup>, Franco Bottoni<sup>6</sup>, Veronica  
5 Pelliccia<sup>3,4</sup>, Ivana Sartori<sup>3</sup>, Giorgio Lo Russo<sup>3</sup>, Stefano F. Cappa<sup>5,7\*</sup>, Silvestro Micera<sup>1,2\*</sup>, Andrea Moro<sup>5</sup>

6

7 **Affiliations**

8 <sup>1</sup>The Biorobotics Institute, Scuola Superiore Sant’Anna, Pisa, Italy.

9 <sup>2</sup>Translational Neural Engineering Laboratory, Center for Neuroprosthetics and Institute of Bioengineering,  
10 EPFL – Campus Biotech, Geneva, Switzerland.

11 <sup>3</sup>"Claudio Munari" Center for Epilepsy Surgery, ASST Grande Ospedale Metropolitano Niguarda, Milan, Italy

12

13 <sup>4</sup> Institute of Neuroscience, CNR, Parma, Italy

14

15 <sup>5</sup> Neurocognition Epistemology and theoretical Syntax Research Center (NEtS), Scuola Universitaria  
16 Superiore IUSS, Pavia, Italy.

17 <sup>6</sup> Istituto Clinico Humanitas, IRCCS, Rozzano, Italy.

18 <sup>7</sup> IRCCS Mondino Foundation National Institute of Neurology, Pavia, Italy

19

20

21 Co-corresponding authors

22 SM (Silvestro.micera@epfl.ch[santannapisa.it]), AM (andrea.moro@iusspavia.it)

23

1 Supplemental Data Items

2

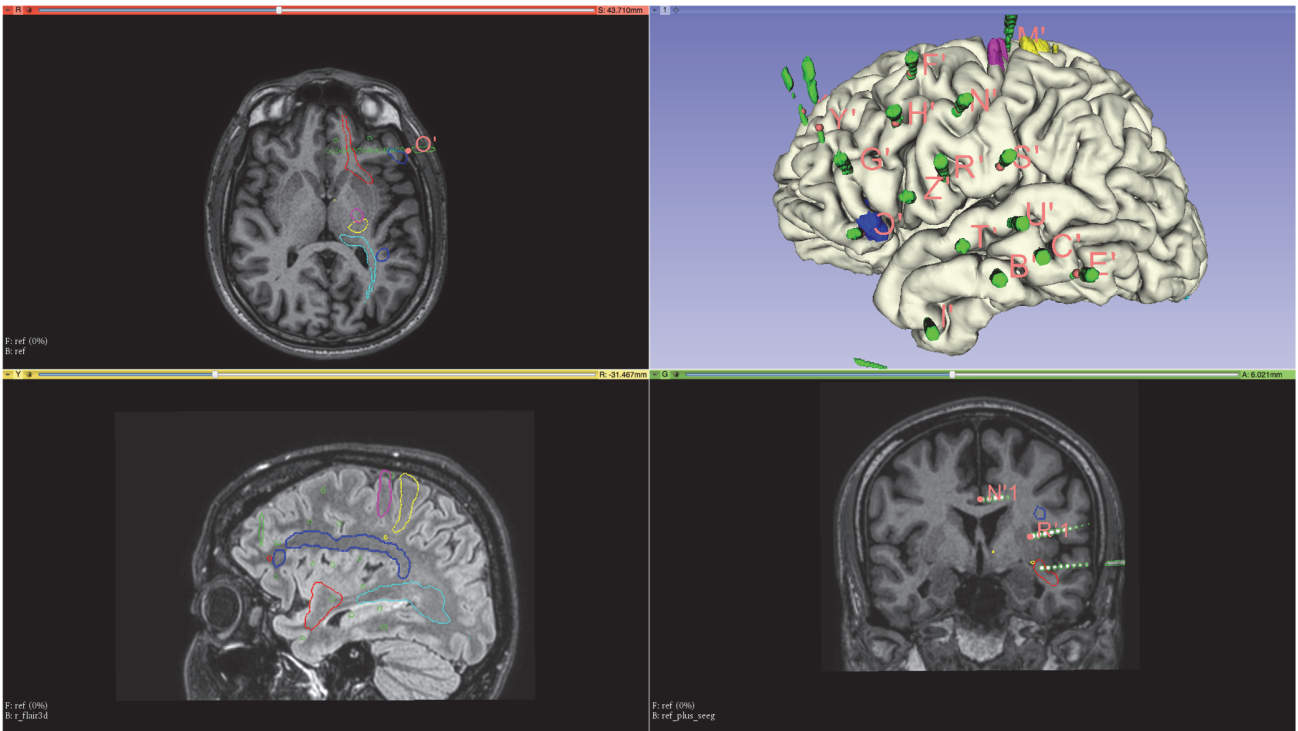

3

4 Ext. Data Figure 1: Example of Multimodal and interactive scene assembled with 3D Slicer software of patient  
5 s11.

6

7

8

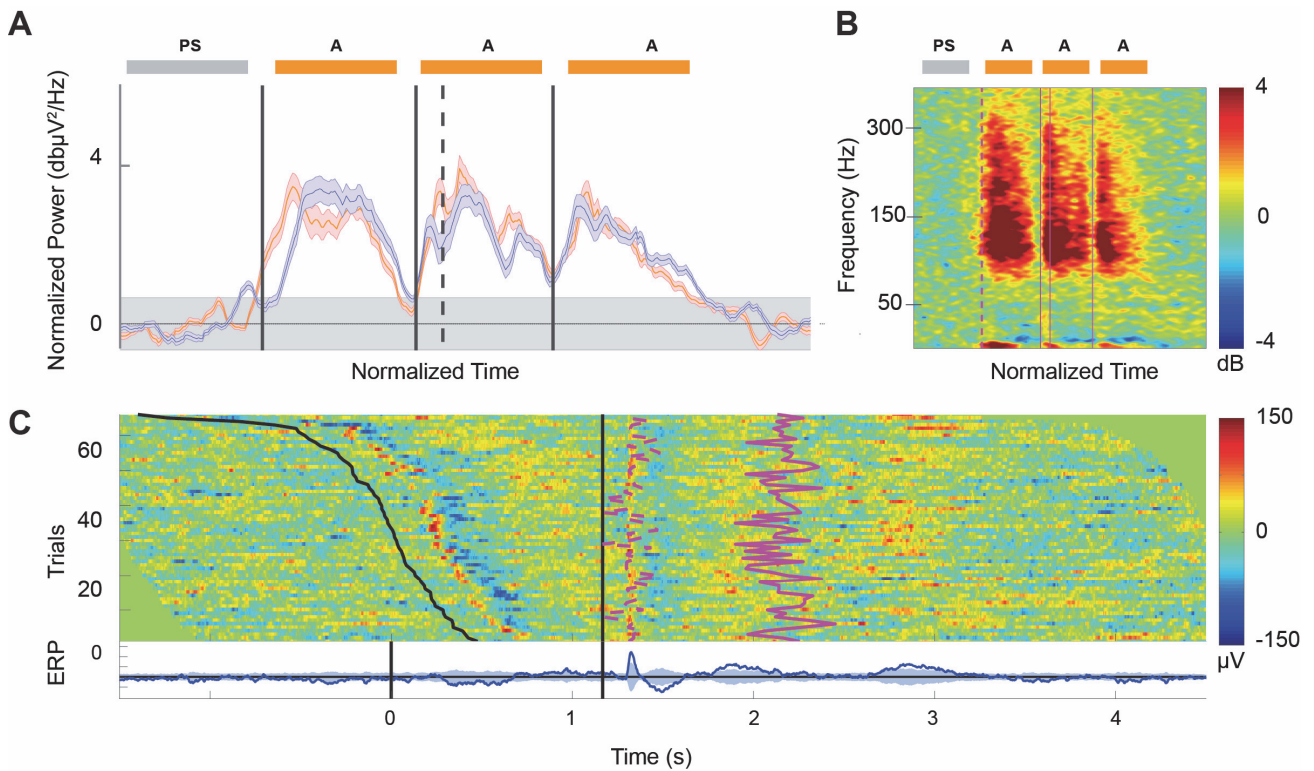

1  
 2 **Ext. Data Figure 2:** Heschl ERPImage and Time Frequency. A) Band-specific (150 -300 Hz) ERSP (bERSP) for  
 3 VPs (red) and NPs (blue) respectively for a Heschl contact. The four vertical bars separate the auditory stimuli  
 4 (A) from the prestimulus interval (PS) and respectively indicate the beginning of the phrase, the beginning of  
 5 the Art/CI, the beginning of the word immediately following Art/CI (Verb/Noun), the beginning of the word  
 6 after. B) Time-warped Event-Related Spectral Perturbation (ERSP) of verb and noun phrases pooled together.  
 7 The four vertical bars have the same meaning as in the baseline-normalized power plots (panel A). C) Event-  
 8 related single-trial potential image (ERPImage) time-locked to the stimulus presentation. Trials are aligned to  
 9 the beginning of Art/CI (continuous black vertical line). The first black line indicates the beginning of the  
 10 phrase for each trial. The following two pink lines respectively indicate the beginning of the word immediately  
 11 following Art/CI (Verb/Noun) and the beginning of the word after, for each trial.

12  
 13  
 14  
 15  
 16





|                        | Noun-phrase  |               |             |                | Verb-phrase  |               |             |                |
|------------------------|--------------|---------------|-------------|----------------|--------------|---------------|-------------|----------------|
|                        | Article      |               |             |                | Pronoun      |               |             |                |
|                        | <i>valid</i> | <i>miss %</i> | <i>mean</i> | <i>std</i>     | <i>valid</i> | <i>miss %</i> | <i>mean</i> | <i>std</i>     |
| freq. Repubblica form  | 30           | 3.23          | 1.45        | 0.50           | 21           | 32.26         | 2.95        | 0.52           |
| freq. ITWAC form       | 31           | 0             | 1.46        | 0.48           | 22           | 29.03         | 2.84        | 0.64           |
| freq. Repubblica lemma | 30           | 3.23          | 1.14        | 0.86           | 31           | 0             | 2.23        | 0.66           |
| freq. ITWAC lemma      | 31           | 0             | 1.39        | 0.68           | 31           | 0             | 2.39        | 0.63           |
|                        | Noun         |               |             |                | Verb         |               |             |                |
|                        | <i>valid</i> | <i>miss %</i> | <i>mean</i> | <i>st.dev.</i> | <i>valid</i> | <i>Miss %</i> | <i>mean</i> | <i>st.dev.</i> |
| freq. Repubblica form  | 31           | 0             | 3.90        | 0.76           | 18           | 41.94         | 3.73        | 0.9            |
| freq. ITWAC form       | 31           | 0             | 3.78        | 0.57           | 23           | 25.81         | 4.07        | 1.16           |
| freq. Repubblica lemma | 31           | 0             | 3.67        | 1.09           | 31           | 0             | 3.80        | 0.71           |
| freq. ITWAC lemma      | 31           | 0             | 3.90        | 0.72           | 31           | 0             | 3.72        | 0.71           |

1  
2 **Ext. Data Table 2:** Surprisal values analyses. Number of valid cases, percentage of missing, mean and the standard deviation relative to the  
3 surprisal value, separately for the two experimental conditions (Noun-phrase, Verb-phrase).  
4  
5

|             | Low<br>Surprisal | High<br>Surprisal | tot<br>(n) |
|-------------|------------------|-------------------|------------|
| noun-phrase | 26               | 5                 | 31         |
| verb-phrase | 5                | 26                | 31         |
| tot (n)     | 31               | 31                |            |

- 1
- 2 **Ext Data Table 3:** distribution of the surprisal values of articles and clitics on the basis of the median ( $M = 1.9097$ ) obtained from the occurrence of
- 3 the lemma in the ITWAC database.
- 4

|                                     |                     |
|-------------------------------------|---------------------|
| Number of patients                  | 10                  |
| Gender                              | 5 male and 5 female |
| Median age at SEEG                  | 32 (range 17-44)    |
| Median years of scholarization      | 13 (range 0-17)     |
| Median age of onset of epilepsy     | 16 (range 2-30)     |
| Median duration of epilepsy (years) | 15 (range 3-30)     |

1  
2 **Ext. Data Table 4:** Demographic data. Summary of demographic data of patients that successfully completed the study. SEEG: Stereo-Electro-  
3 Encephalography.  
4
